# Supplementary material for: N-doped titanate nanostructures on gradient surface layer of one dimensional nanofibers synthesized on Ti electrode by chemical and thermal treatments
Source: Royal Society of Chemistry journal article supplement (doi:10.1039/c3ta13728g), 2013-11-04
Supplement: c3ta13728g.pdf [file c3ta13728g.pdf]

## Supplementary information

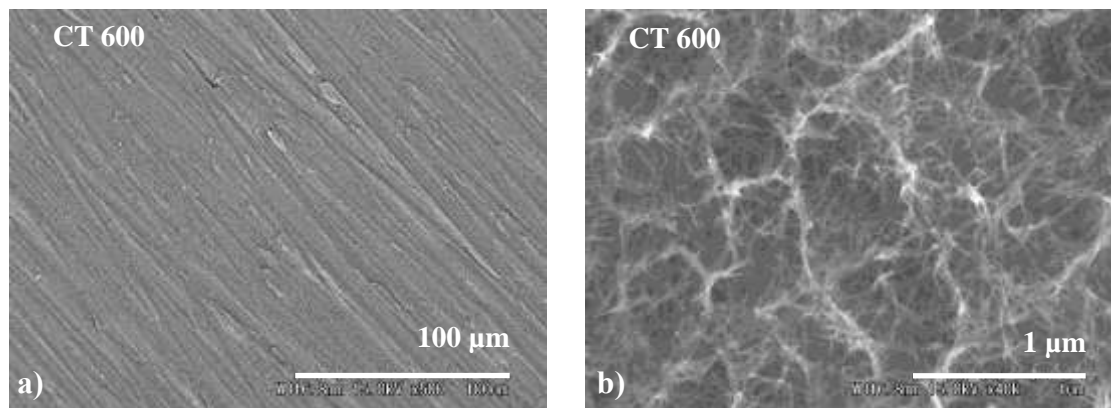

Fig. S1†: FE-SEM images of the top surface of CT600 at low magnification (a) and high magnification (b), respectively.

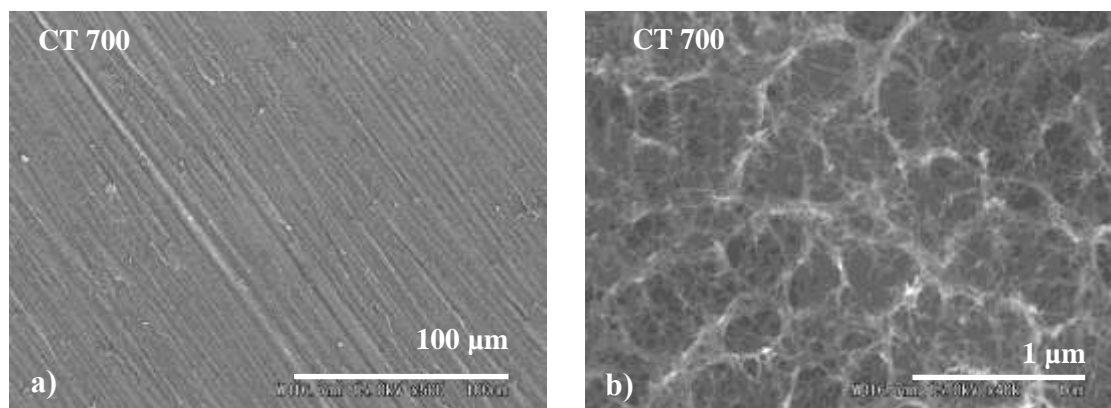

Fig. S2†: FE-SEM images of the top surface of CT700 at low magnification (a) and high magnification (b), respectively.

**Table S1†: Summary of phases in chemically treated (C) and chemically and thermally treated (CT) Ti metal.**

| Phase              | Chemical treatment (C)<br>Chemical and thermal<br>treatment (CT) |       |       |       |
|--------------------|------------------------------------------------------------------|-------|-------|-------|
|                    | C                                                                | CT600 | CT700 | CT800 |
| H-titanate         | ○                                                                | ○     | ○     | ×     |
| N-H-titanate       | ×                                                                | ○     | ○     | ○     |
| Anatase            | ×                                                                | ○     | ×     | ×     |
| N-doped<br>Anatase | ×                                                                | ×     | ○     | ○     |
| TiO                | ×                                                                | ×     | ○     | ○     |
| Ti-<br>oxynitride  | ×                                                                | ×     | ○     | ○     |
| Ti <sub>2</sub> N  | ×                                                                | ○     | ○     | ○     |
| N-doped Ti         | ×                                                                | ×     | ×     | ○     |
| Ti                 | ○                                                                | ○     | ○     | ×     |
